# Supplementary material
Source: PubMed Central journal article supplement (PMC1847657)
Supplement: 7601623s2.pdf [file 7601623s2.pdf]

A

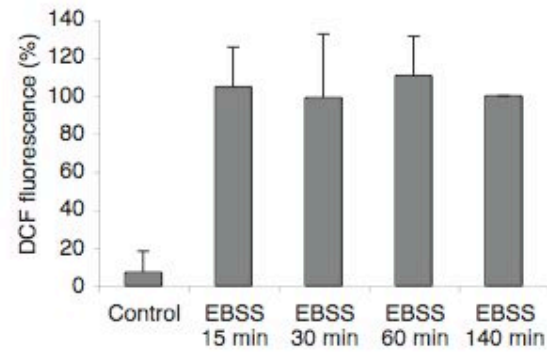

B

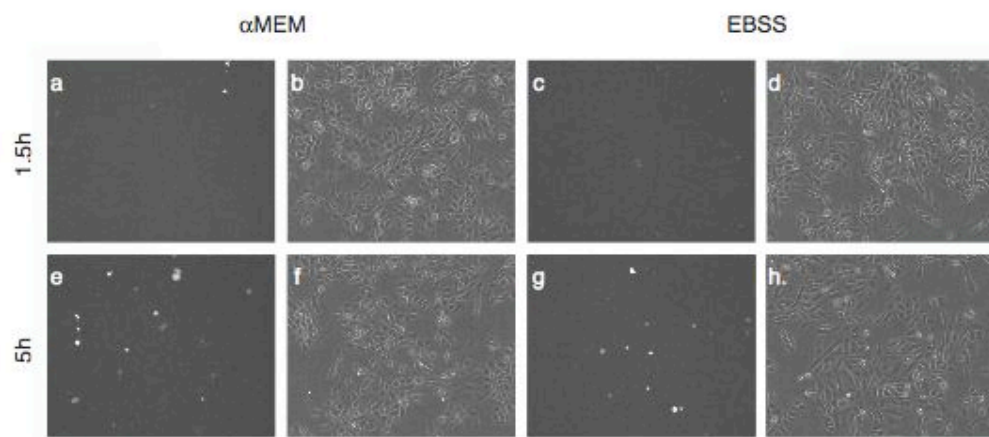

C

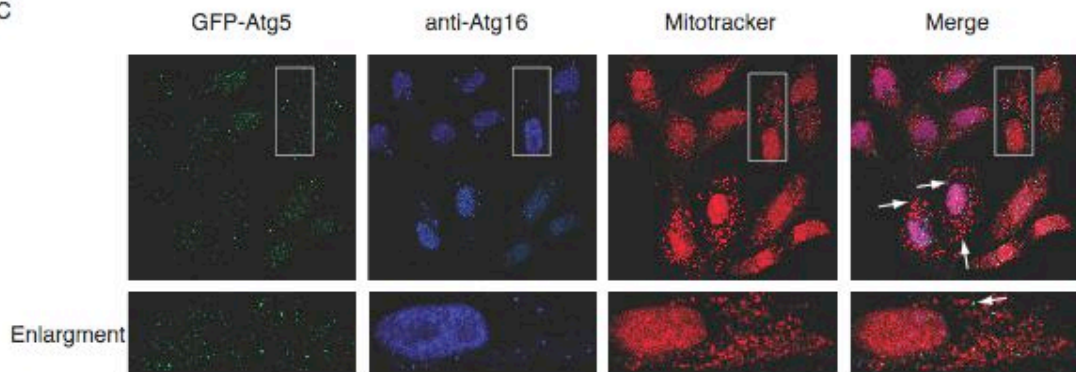

**Supplementary Figure 1. Starvation-induced ROS accumulation does not trigger cell death.** (A) CHO cells grown in 96 well plates were maintained in a control medium ( $\alpha$ -MEM, 10% FCS) or starved in EBSS for the indicated time periods which include a 10 min treatment with 30  $\mu$ M DCFDA, and subsequently analyzed in a fluorimeter as detailed in Materials and Methods. (B) CHO cells deprived of serum ( $\alpha$ MEM) or completely starved (EBSS) for the indicated time periods, were incubated in the presence of 10  $\mu$ g/ml Propidium Iodide (PI) for 30 min, after which they were washed and visualized using a Nikon eclipse TE300 fluorescent microscope. (C) CHO cells stably transfected with YFP-Atg5 were starved for 2 h in EBSS, treated with 5 nM Mito-Tracker Red for 30 min at 37°C, washed, fixed with 3% Paraformaldehyde for 10 min and permeabilized with 0.1% triton for 10 min. The cells were then stained with anti-Atg16 polyclonal antibodies and visualized by a confocal microscope as detailed in Materials and Methods. The experiment was repeated 3 times; representative images are shown.
